# Supplementary material for: [Pd(acac)(MeCN)2]BF4: air-tolerant, activator-free catalyst for alkene dimerization and polymerization
Source: Royal Society of Chemistry journal article supplement (doi:10.1039/c5ra24591e), 2015-01-01
Supplement: c5ra24591e1.pdf [file c5ra24591e1.pdf]

## Supporting Information

Pd(acac)(MeCN)<sub>2</sub>BF<sub>4</sub>: air-tolerant, activator-free catalyst for alkenes dimerization and polymerization

*D.S. Suslov<sup>a,1</sup>, M.V. Bykov<sup>a</sup>, P.A. Abramov<sup>b,c</sup>, M.V. Belova<sup>a</sup>, I.A. Ushakov<sup>d</sup>, V.K. Voronov<sup>d</sup>,  
V.S. Tkach<sup>a</sup>*

<sup>a</sup>Irkutsk State University, ul. K.Marksa, 1, Irkutsk, Russia, 664003

<sup>b</sup>Nikolaev Institute of Inorganic Chemistry SB RAS, pr-kt Akad. Lavrentieva, 3, Novosibirsk, Russia, 630090

<sup>c</sup>Novosibirsk State University, ul. Pirogova, 2, Novosibirsk, Russia, 630090

<sup>d</sup>Irkutsk State Tech Univ, Lermontov St, 83, Irkutsk, Russia, 664074

---

<sup>1</sup> Correspondence should be addressed: e-mail: [suslov@chem.isu.ru](mailto:suslov@chem.isu.ru); [suslov.dmitry@gmail.com](mailto:suslov.dmitry@gmail.com)

## Experimental details

All manipulations for air sensitive compounds were carried out under a stream of dry argon using standard inert techniques. Argon was purified before feeding to the reactor by passing through columns packed with oxygen scavenger (Fisher REDOX) and molecular sieve 5A (Aldrich), respectively.  $\text{CH}_2\text{Cl}_2$  and  $\text{CH}_3\text{CN}$  were distilled from  $\text{CaH}_2$ . Solvents were stored over molecular sieves. Styrene, 4-methylstyrene, 4-*t*Bu-styrene (99%, Aldrich) were purified by distillation under reduced pressure over  $\text{CaH}_2$ . Norbornene (Acros, 99%) were distilled from sodium-benzophenone and used as a solution (80 wt.%) in  $\text{CH}_2\text{Cl}_2$ .  $\text{BF}_3 \cdot \text{OEt}_2$  (Acros, 99%) was distilled over  $\text{CaH}_2$  prior to use.  $\text{Pd}(\text{acac})_2$  was synthesized according to a literature procedure<sup>1</sup> and recrystallized from acetone. All NMR spectra were recorded at room temperature on a Varian VXR-500S spectrometer or a Bruker DPX-250 spectrometer. IR spectra from KBr pellets were recorded on a Simex Infracum FT 801 spectrometer. Elemental analyses were measured using a CHN Thermo Finnigan Flash EA 1112 instrument. TG/DSC measurements were performed with a Netzsch STA 449-F3 instrument. The products of the catalytic runs were analyzed by GC-MS (Shimadzu QP2010 Ultra, GSBP-5MS capillary column) and GC (Chromatec, Crystall 5000.2, SGE BPX-5 capillary column).

### Dimerization of styrenes

A mixture of the styrene (or styrene derivative) (22.7 mmol), 1.5 mL of  $\text{CH}_2\text{Cl}_2$ , and  $[\text{Pd}(\text{acac})(\text{MeCN})_2]\text{BF}_4$  (22.7  $\mu\text{mol}$ ) were placed in a 10 mL glass flask equipped with a magnetic stirring bar. The reaction was carried out at 25 °C for 12 h with stirring. The conversion and selectivity were determined by GC. The products were isolated by vacuum distillation and analyzed by GS-MS and NMR spectroscopy.

### Polymerization of norbornene

Polymerizations were carried out in a 10-mL glass reactor equipped with a magnetic stirrer. The reactor was filled with norbornene as a solution in  $\text{CH}_2\text{Cl}_2$ , the solution was kept at desired temperature for 15 min and then the palladium complex was added. After stirring for a time needed, the polymers formed were precipitated in ethanol. The precipitated polymers were washed three times with ethanol, and dried in vacuum at 80 °C for 6 h.

### Preparation of $[\text{Pd}(\text{acac})(\text{MeCN})_2]\text{BF}_4$

$\text{BF}_3 \cdot \text{OEt}_2$  (0.6 mL, 4.98 mmol) was added dropwise to solution of  $\text{Pd}(\text{acac})_2$  (0.75 g, 2.46 mmol) and MeCN (0.65 mL) in toluene (150 mL) and stirred at room temperature for 1 h. The reaction mixture was cooled to -18 °C and stored overnight. The crude product was then filtered, and the yellow solid was washed

twice with Et<sub>2</sub>O and dried under vacuum. Yield: 0.88 g (96%). Anal. Calcd for C<sub>9</sub>H<sub>13</sub>BF<sub>4</sub>N<sub>2</sub>O<sub>2</sub>Pd: C, 28.87; H, 3.50; N, 7.48. Found: C, 28.36; H, 3.38; N, 7.08. Melting point 117 °C. <sup>1</sup>H NMR (400.1 MHz, CD<sub>3</sub>CN): δ 5.75 (s, 1H, acac-CH), 2.09 (s, 6H, acac-CH<sub>3</sub>), 1.96 (s, 6H, CH<sub>3</sub>). <sup>13</sup>C{<sup>1</sup>H} NMR (100.7 MHz, CD<sub>3</sub>CN): δ 187.7 (acac-CO), 118.3 (C≡N), 102.4 (acac-CH), 24.3 (acac-CH<sub>3</sub>), 1.5 (CH<sub>3</sub>). <sup>19</sup>F NMR (376.3 MHz, CD<sub>3</sub>CN): δ -152.09 (s, 1F), -152.15 (s, 4F) (BF<sub>4</sub>, the integral ratio of the two signals is 1:4 equal to the <sup>10</sup>B/<sup>11</sup>B isotopic ratio, natural isotopic abundance: <sup>10</sup>B/<sup>11</sup>B=19.4%/80.6%). <sup>11</sup>B NMR (128.3 MHz, CD<sub>3</sub>CN): δ -1.82 (BF<sub>4</sub>).

After evaporation in vacuo, the filtrate was observed to give 0.34 g of a white powder, BF<sub>2</sub>(acac). The product was characterized by GS-MS analysis and FTIR.

### Calculations

All density functional theory calculations were performed with the ORCA program.<sup>2</sup> All geometry optimizations were run with tight convergence criteria, using the BP86 functional,<sup>3,4</sup> making use of the resolution of the identity technique.<sup>5</sup> The applicability of gradient-corrected functionals as BP86 for the structural prediction of transition metal compounds and reliable determination of the kinetic balance are well documented<sup>6-11</sup>. The basis sets that were used were the Weigend–Ahlich basis sets.<sup>12,13</sup> Triple- $\xi$ -quality basis sets with one set of polarization functions (def2-TZVP) were used for the palladium. The remaining atoms were described by slightly smaller def2-SVP basis sets. A scalar relativistic correction was applied using the zeroth-order regular approximation (ZORA) method.<sup>14-16</sup>

### X-ray Diffraction Studies

Crystallographic data and refinement details are given in Table 1S. The diffraction data were collected on a New Xcalibur (Agilent Technologies) diffractometer with MoK $\alpha$  radiation ( $\lambda = 0.71073$ ) by doing  $\varphi$  and  $\omega$  scans of narrow (0.5°) frames at 130 K. Absorption correction was done empirically using SCALE3 ABSPACK (CrysAlisPro, Agilent Technologies, Version 1.171.37.35 (release 13-08-2014 CrysAlis171 .NET) (compiled Aug 13 2014,18:06:01)). Structure was solved by direct method and refined by full-matrix least-squares treatment against  $|F|^2$  in anisotropic approximation with ShelXle program.<sup>17</sup> All non-hydrogen atoms of 1 were refined anisotropically. The hydrogen atoms were refined directly from experiment for  $\gamma$ -CH of acac<sup>-</sup> ligand and CH<sub>3</sub> groups of coordinated CH<sub>3</sub>CN molecules. The hydrogen atoms of CH<sub>3</sub> groups of the acac<sup>-</sup> ligand were not localized.

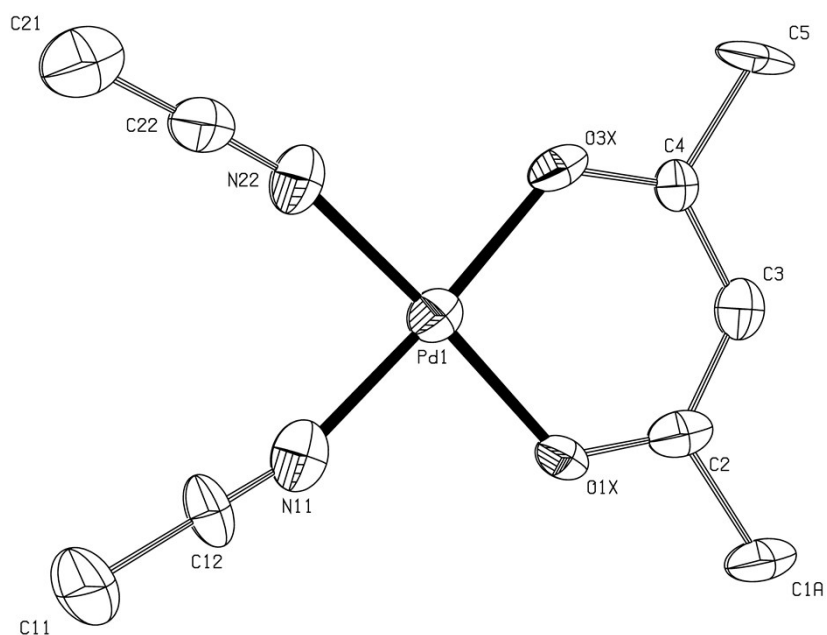

Fig. S1. Displacement ellipsoid plot (50% probability) of  $[\text{Pd}(\text{acac})(\text{MeCN})_2]\text{BF}_4$  (**1**). The counteranion  $\text{BF}_4$  was omitted for clarity. Selected bond distances ( $\text{\AA}$ ): Pd1–O1X 1.953(9), Pd1–O3X 1.957(9), Pd1–N22 1.991(12), Pd1–N11 1.994(13).

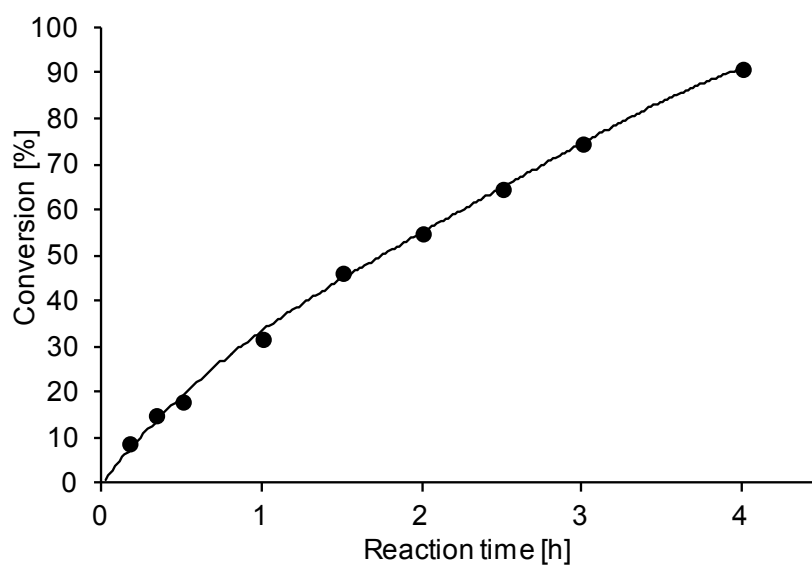

Fig. S2. Plot of Polymerization Yields vs. Reaction Time for **1** at  $20^\circ\text{C}$  in  $\text{CH}_2\text{Cl}_2$ ;  $[\text{NB}]_0/[\text{Pd}]_0 = 10\,000$ ; 40.5 mmol NB;  $C_{\text{Pd}} = 7.7 \cdot 10^{-4}$  mol/l

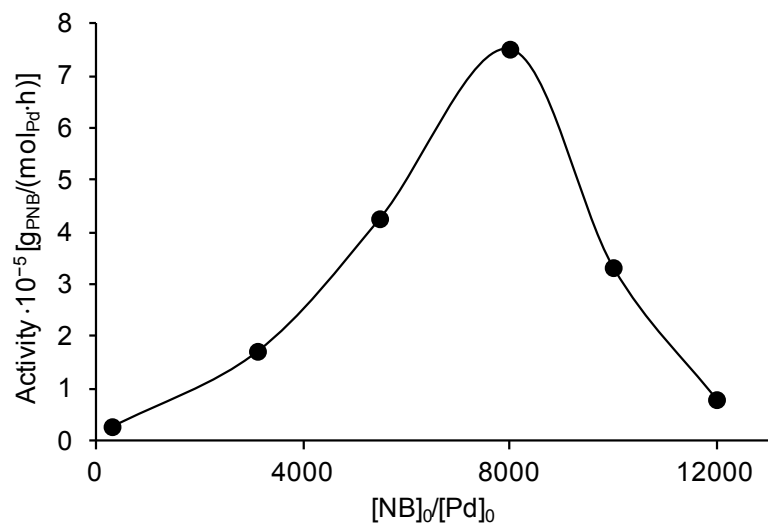

Fig. S3. Plot of activity vs. NB/Pd [mole ratio] for **1** at 20°C in CH<sub>2</sub>Cl<sub>2</sub>; 40.5 mmol NB;  $C_{Pd} = 7.7 \cdot 10^{-4}$  mol/l

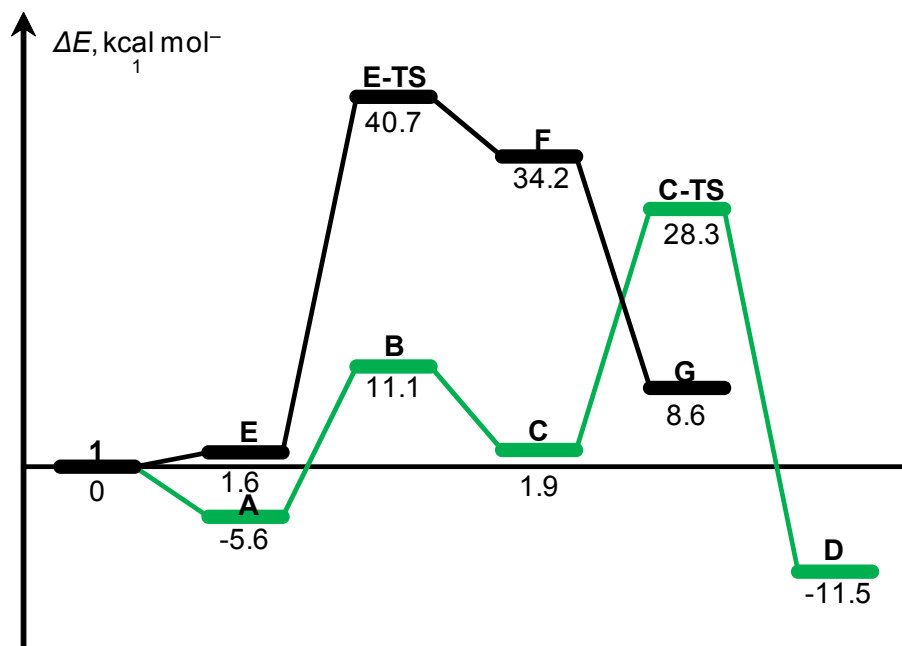

Fig. S4. Energy Diagram for the Reaction of **1** with Styrene.

## 1. Crystal Structure Determination of **1**

Table S1. X-Ray Crystal Structure Data for **1** (CCDC 1414861)

|                                                                         | (1)                                                                                                                                                                                                                                                          |
|-------------------------------------------------------------------------|--------------------------------------------------------------------------------------------------------------------------------------------------------------------------------------------------------------------------------------------------------------|
| Chemical formula                                                        | C <sub>9</sub> H <sub>13</sub> BF <sub>4</sub> N <sub>2</sub> O <sub>2</sub> Pd                                                                                                                                                                              |
| $M_r$                                                                   | 374.42                                                                                                                                                                                                                                                       |
| Crystal system, space group                                             | Monoclinic, <i>C2/m</i>                                                                                                                                                                                                                                      |
| Temperature (K)                                                         | 130                                                                                                                                                                                                                                                          |
| $a, b, c$ (Å)                                                           | 14.4049 (4), 6.40080 (18), 14.9520 (5)                                                                                                                                                                                                                       |
| $\beta$ (°)                                                             | 106.995 (3)                                                                                                                                                                                                                                                  |
| $V$ (Å <sup>3</sup> )                                                   | 1318.42 (7)                                                                                                                                                                                                                                                  |
| $Z$                                                                     | 4                                                                                                                                                                                                                                                            |
| Radiation type                                                          | Mo $K\alpha$                                                                                                                                                                                                                                                 |
| $\mu$ (mm <sup>-1</sup> )                                               | 1.886                                                                                                                                                                                                                                                        |
| Crystal size (mm)                                                       | 0.12 × 0.04 × 0.02                                                                                                                                                                                                                                           |
| Diffractionmeter                                                        | New Xcalibur, AtlasS2 diffractometer                                                                                                                                                                                                                         |
| Absorption correction                                                   | Multi-scan <i>CrysAlis PRO</i> , Agilent Technologies, Version 1.171.37.35 (release 13-08-2014 CrysAlis171 .NET) (compiled Aug 13 2014,18:06:01) Empirical absorption correction using spherical harmonics, implemented in SCALE3 ABSPACK scaling algorithm. |
| $T_{\min}, T_{\max}$                                                    | 0.777, 1.000                                                                                                                                                                                                                                                 |
| No. of measured, independent and observed reflections                   | 3936, 1982, 1795                                                                                                                                                                                                                                             |
| $R_{\text{int}}$                                                        | 0.028                                                                                                                                                                                                                                                        |
| $(\sin \theta/\lambda)_{\text{max}}$ (Å <sup>-1</sup> )                 | 0.723                                                                                                                                                                                                                                                        |
| $R[F^2 > 2\sigma(F^2)], wR(F^2), S$                                     | 0.038, 0.099, 1.07                                                                                                                                                                                                                                           |
| No. of reflections, parameters, restraints                              | 1982, 124, 0                                                                                                                                                                                                                                                 |
| H-atom treatment                                                        | Only H-atom coordinates refined                                                                                                                                                                                                                              |
| $\Delta\rho_{\text{max}}, \Delta\rho_{\text{min}}$ (e Å <sup>-3</sup> ) | 1.97, -1.38                                                                                                                                                                                                                                                  |

Computer programs: Computer programs: '*CrysAlis PRO*, Agilent Technologies, Version 1.171.37.35 (release 13-08-2014 CrysAlis171 .NET) (compiled Aug 13 2014,18:06:01)', *SHELXL2013* (Sheldrick, 2013), SHELXLE.

Table S2. Selected geometric parameters for **1** (Å, °)

|             |            |                        |            |
|-------------|------------|------------------------|------------|
| Pd1—O1X     | 1.953 (9)  | C3—C2                  | 1.391 (17) |
| Pd1—O3X     | 1.957 (9)  | C2—O1X                 | 1.268 (16) |
| Pd1—N22     | 1.991 (12) | C2—C1A                 | 1.519 (17) |
| Pd1—N11     | 1.994 (13) | C22—C21                | 1.41 (2)   |
| N11—C12     | 1.103 (18) | C12—C11                | 1.50 (2)   |
| N22—C22     | 1.15 (2)   | B1—F3 <sup>i</sup>     | 1.339 (16) |
| C4—O3X      | 1.262 (15) | B1—F3                  | 1.339 (16) |
| C4—C3       | 1.403 (17) | B1—F2                  | 1.34 (3)   |
| C4—C5       | 1.516 (15) | B1—F1                  | 1.38 (3)   |
|             |            |                        |            |
| O1X—Pd1—O3X | 95.2 (3)   | O1X—C2—C1A             | 113.3 (11) |
| O1X—Pd1—N22 | 176.3 (4)  | C3—C2—C1A              | 119.3 (13) |
| O3X—Pd1—N22 | 88.4 (4)   | N22—C22—C21            | 178.0 (17) |
| O1X—Pd1—N11 | 89.0 (4)   | N11—C12—C11            | 179.9 (18) |
| O3X—Pd1—N11 | 175.8 (4)  | F3 <sup>i</sup> —B1—F3 | 107.5 (18) |
| N22—Pd1—N11 | 87.4 (5)   | F3 <sup>i</sup> —B1—F2 | 111.7 (16) |
| C12—N11—Pd1 | 165.4 (13) | F3—B1—F2               | 111.7 (16) |
| C22—N22—Pd1 | 165.6 (12) | F3 <sup>i</sup> —B1—F1 | 108.9 (16) |
| O3X—C4—C3   | 126.5 (11) | F3—B1—F1               | 108.9 (16) |
| O3X—C4—C5   | 115.0 (11) | F2—B1—F1               | 108.0 (16) |
| C3—C4—C5    | 118.5 (11) | C2—O1X—Pd1             | 122.7 (7)  |
| C2—C3—C4    | 124.9 (12) | C4—O3X—Pd1             | 123.3 (8)  |
| O1X—C2—C3   | 127.4 (12) |                        |            |

## 2. NMR spectra of **1**

### $^1\text{H}$ NMR

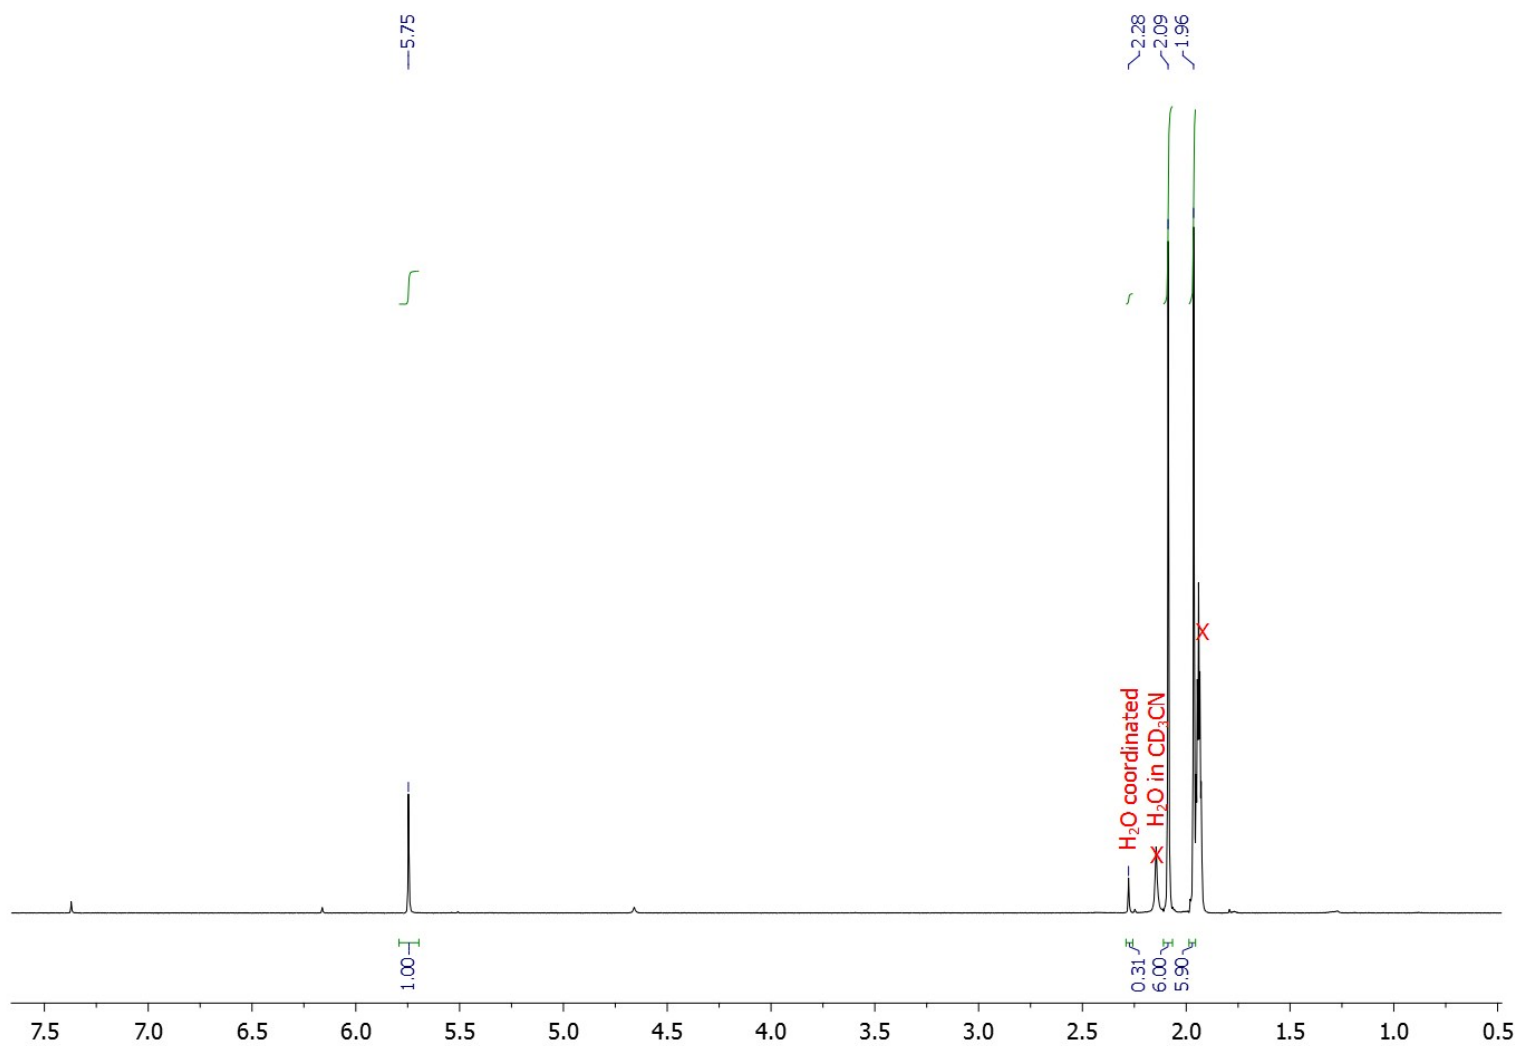



# <sup>13</sup>C NMR

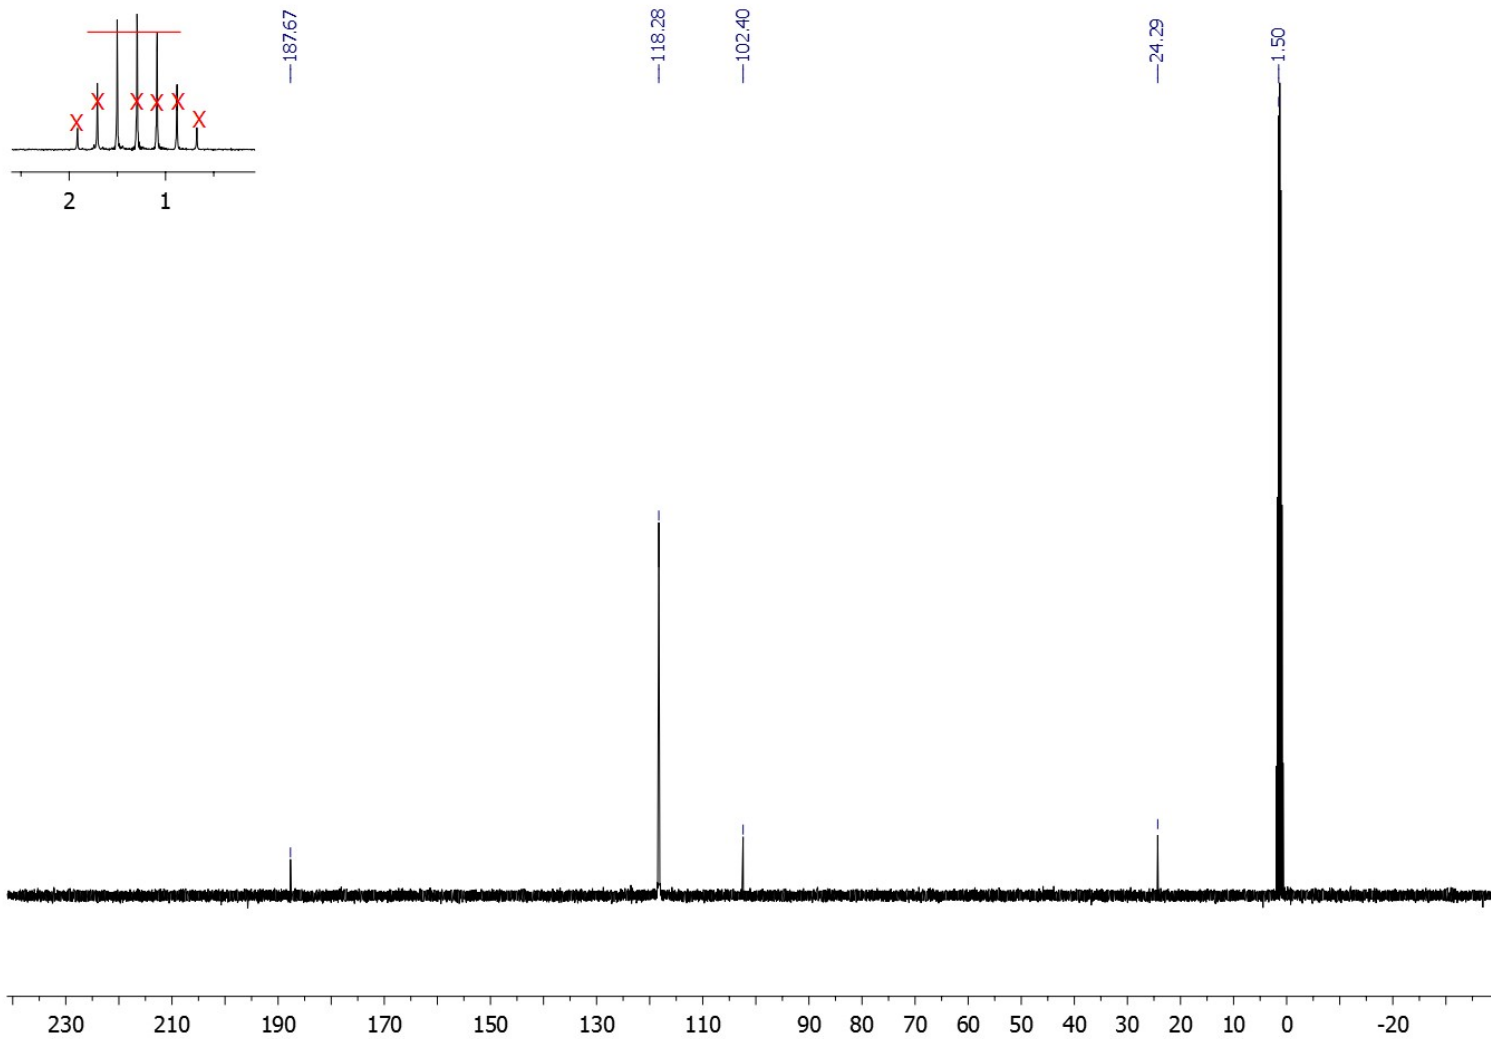

**$^{19}\text{F}$  NMR**

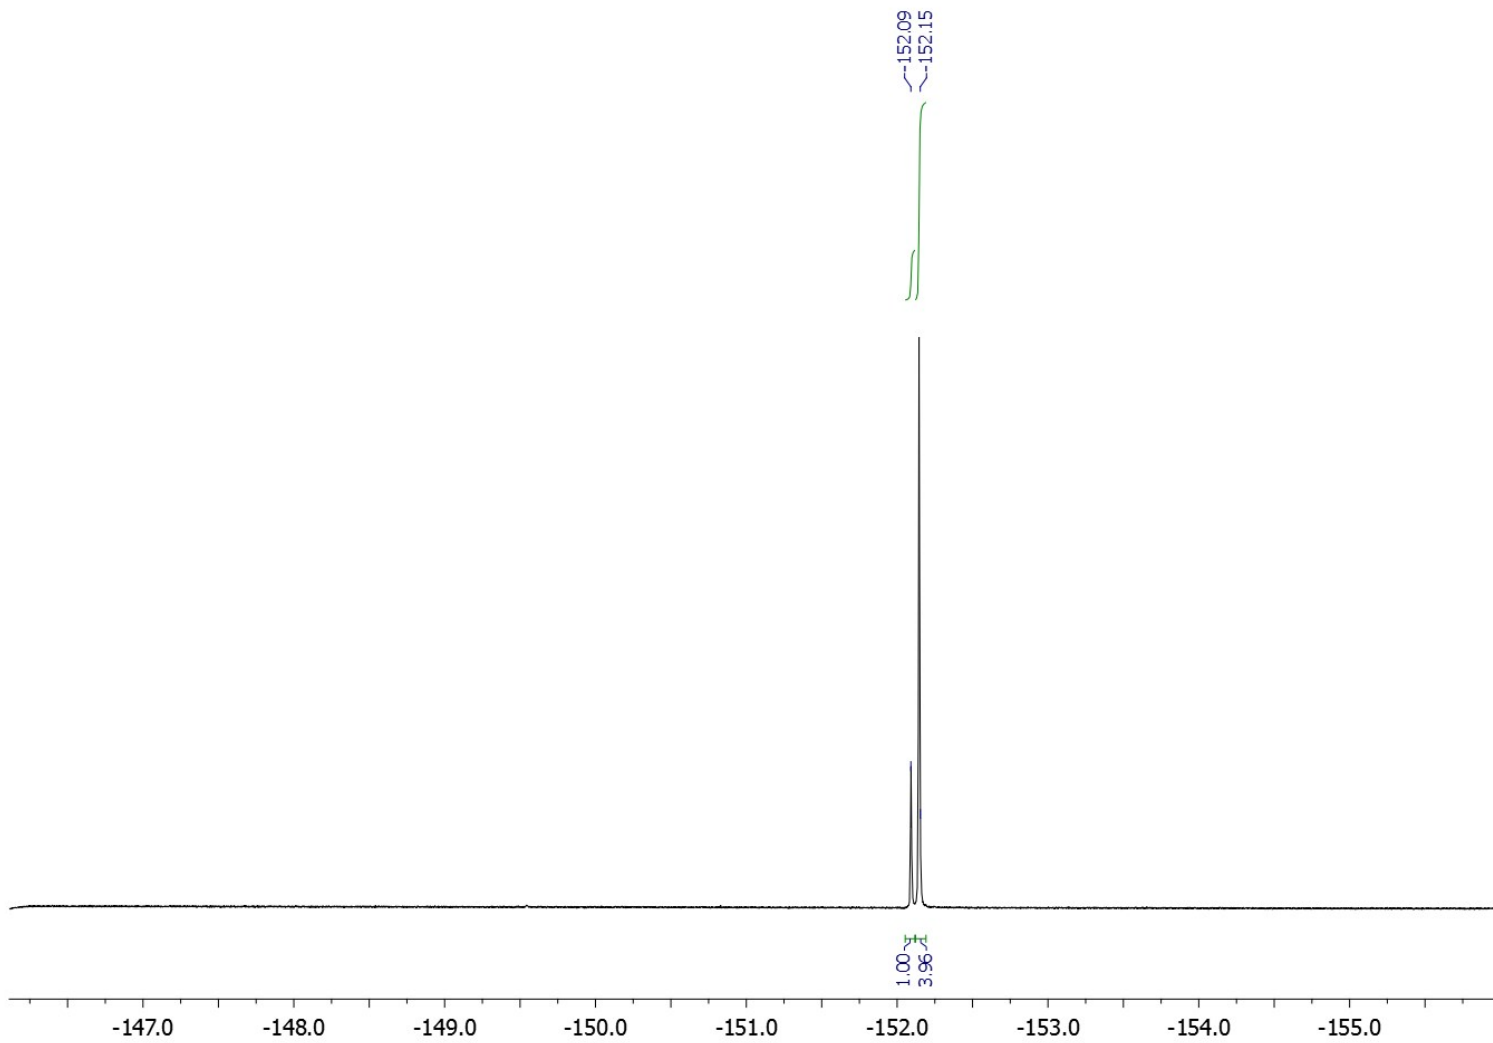

**$^{11}\text{B}$  NMR**

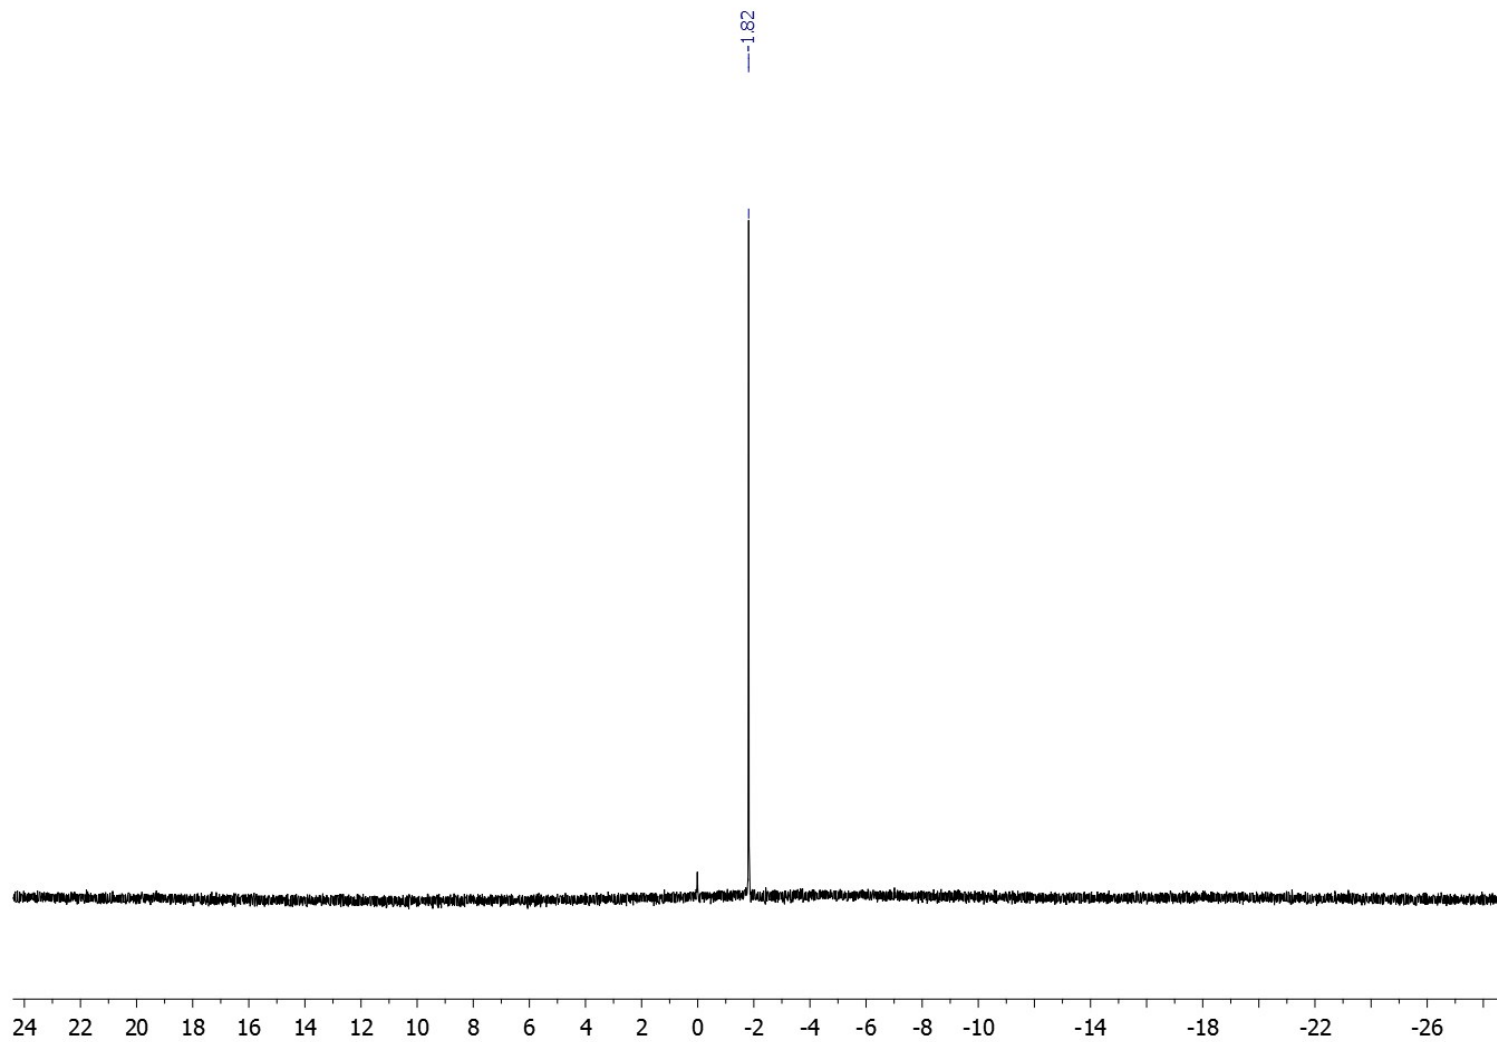

**Impurities in CD<sub>3</sub>CN (<sup>1</sup>H NMR):**

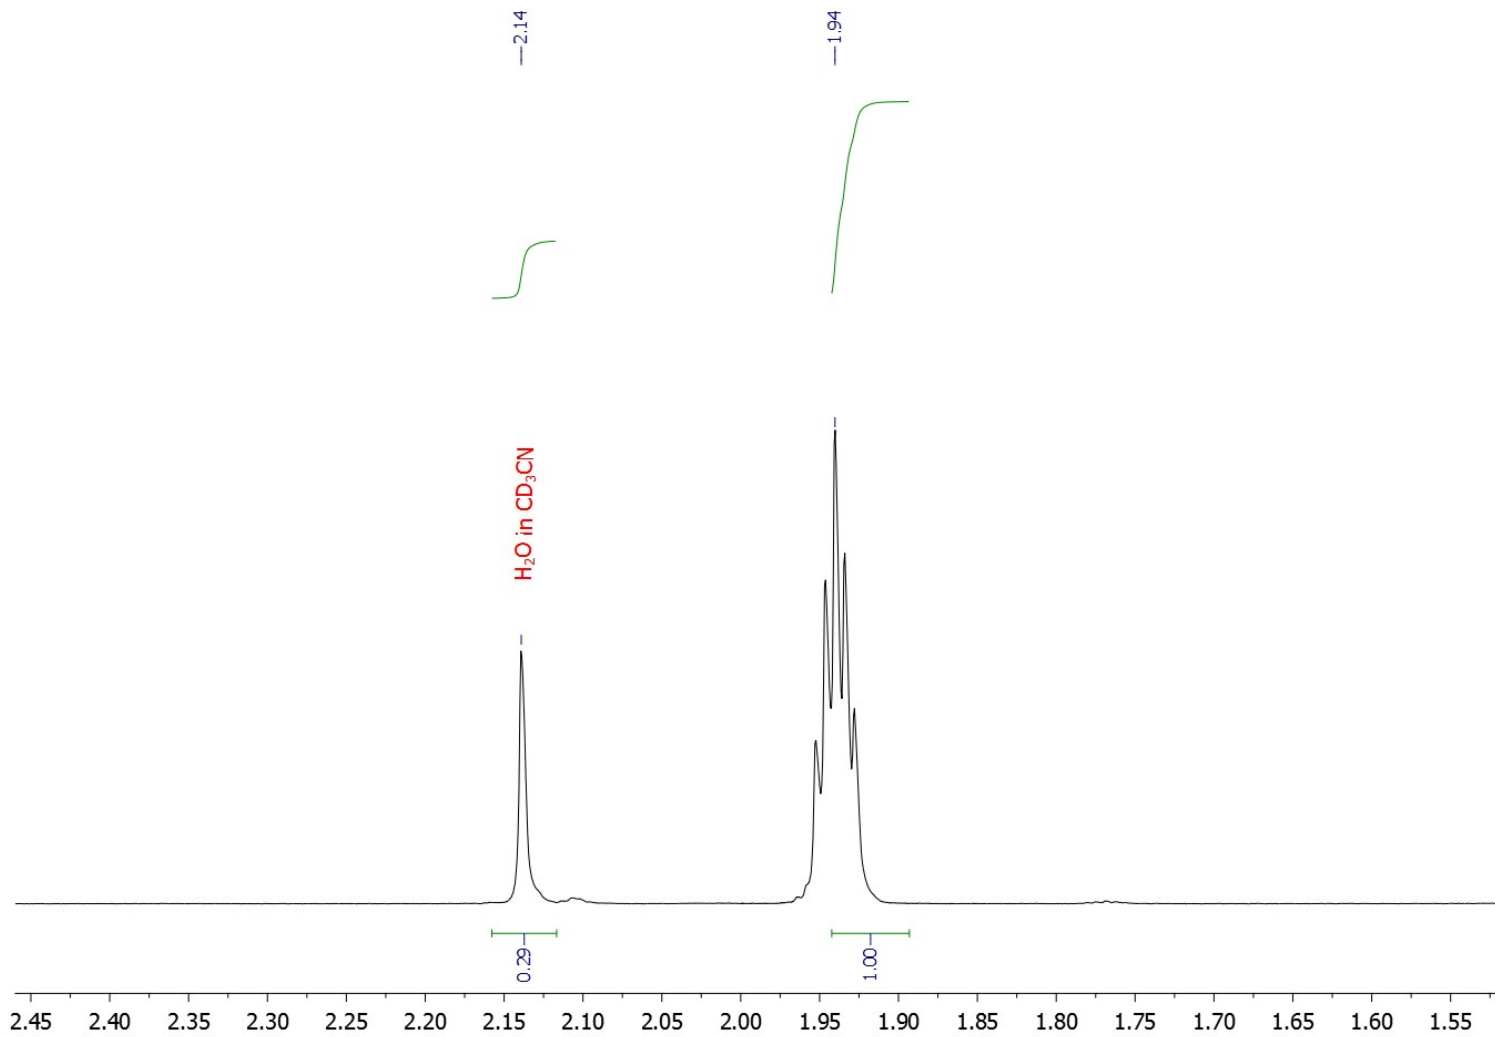

### 3. Vinylarenes dimerization

**1,3-Diphenylbut-1-ene:**  $^1\text{H NMR } \delta$  ( $\text{CDCl}_3$ ): 7.45–7.24 (m, 10 H), 6.48–6.47 (m, 2H), 3.74–3.70 (m, 1H), 1.56–1.53 (m, 3H);  $^{13}\text{C NMR } \delta$  ( $\text{CDCl}_3$ ): 145.8, 137.8, 135.4, 128.7, 127.5, 126.4, 42.8, 21.4.; GC/MS (EI):  $m/z = 208$  ( $\text{M}^+$ ), 207, 194, 193, 191, 189, 179, 178, 165, 131, 130, 129, 128, 116, 115, 103, 91, 89, 78, 77, 65, 51.

**1,3-Di(4-methylphenyl)but-1-ene:**  $^1\text{H NMR } \delta$  ( $\text{CCl}_4$ ): 7.37–7.10 (m, 8H), 6.45–6.36 (m, 2H), 3.79–3.70 (m, 1H), 2.51–2.42 (m, 6H), 1.58–1.56 (m, 3H);  $^{13}\text{C NMR } \delta$  ( $\text{CCl}_4$ ): 142.0, 135.6, 134.6, 134.4, 133.7, 128.6, 127.9, 126.7, 125.7, 41.7, 21.0, 20.7; GC/MS (EI):  $m/z = 236$  ( $\text{M}^+$ ), 235, 222, 221, 220, 207, 206, 205, 193, 192, 191, 178, 165, 144, 143, 130, 129, 128, 127, 117, 115, 109, 105, 103, 102, 101, 91, 89, 79, 77, 65.

**1,3-Di(4-t-butylphenyl)but-1-ene:**  $^1\text{H NMR } \delta$  ( $\text{CCl}_4$ ): 7.47–7.32 (m, 8H), 6.58–6.48 (m, 2H), 3.78–3.69 (m, 1H), 1.59–1.56 (m, 3H), 1.44 (s, 18H);  $^{13}\text{C NMR } \delta$  ( $\text{CCl}_4$ ): 148.9, 147.9, 142.0, 134.4, 133.9, 127.8, 126.5, 125.6, 124.7, 124.6, 41.6, 33.9, 31.1, 20.9; GC/MS (EI):  $m/z = 320$  ( $\text{M}^+$ ), 305, 264, 263, 262, 207, 145, 131, 129, 128, 117, 115, 109, 91, 57, 56, 41.

### 4. Characterization of the polynorbornene

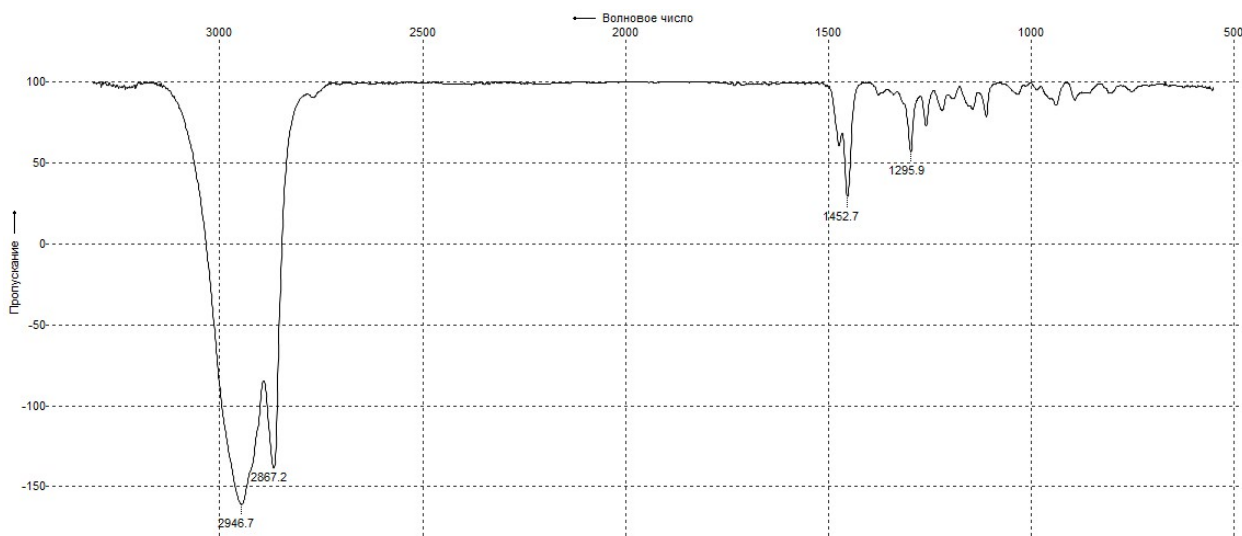

Fig. S5. The IR spectrum of the PNB in KBr

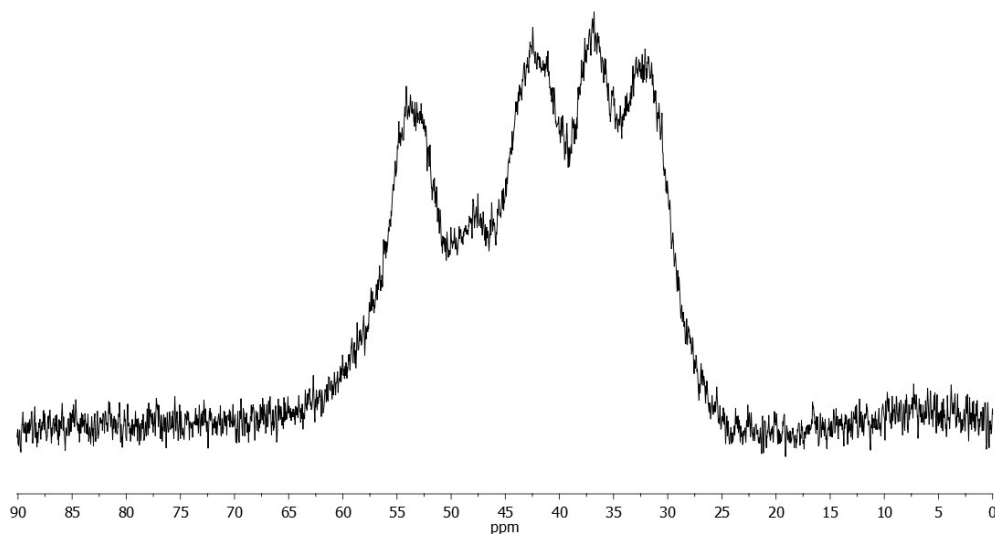

Fig. S6.  $^{13}\text{C}$  NMR spectrum of the PNB in 1,2,4-trichlorobenzene

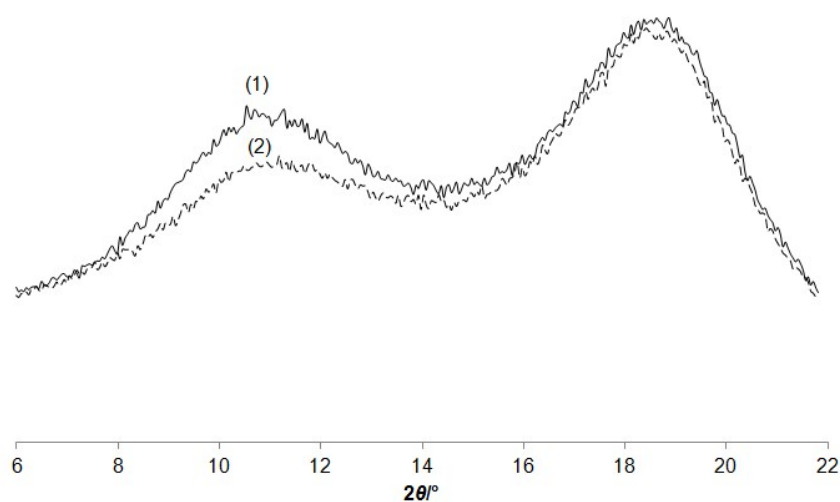

Fig. S7. The WXR D spectra of the polynorbornenes. (1) The polynorbornene produced by  $[\text{Pd}(\text{acac})(\text{MeCN})_2]\text{BF}_4$  complex; (2) The polynorbornene produced by the  $[\text{Pd}(\text{acac})(\text{MeCN})_2]\text{BF}_4/\text{BF}_3\cdot\text{OEt}_2$  catalyst system.

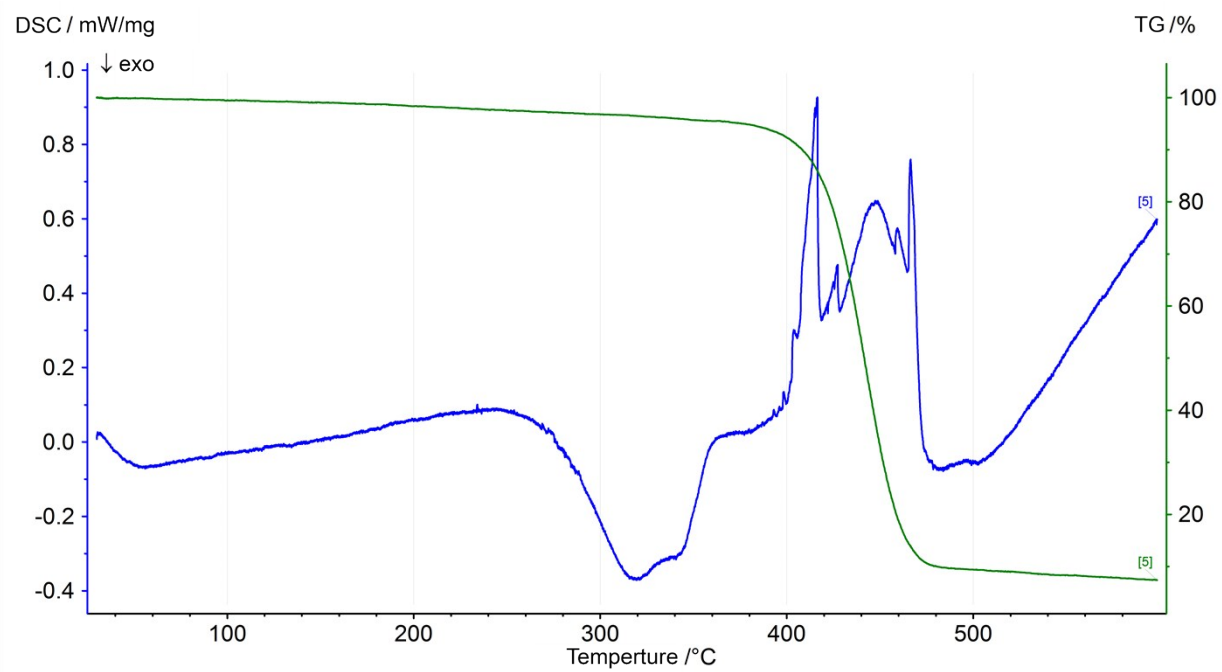

Fig. S8. The DSC/TGA spectrum of the polynorbornene.

## 5. Pre-catalyst activation

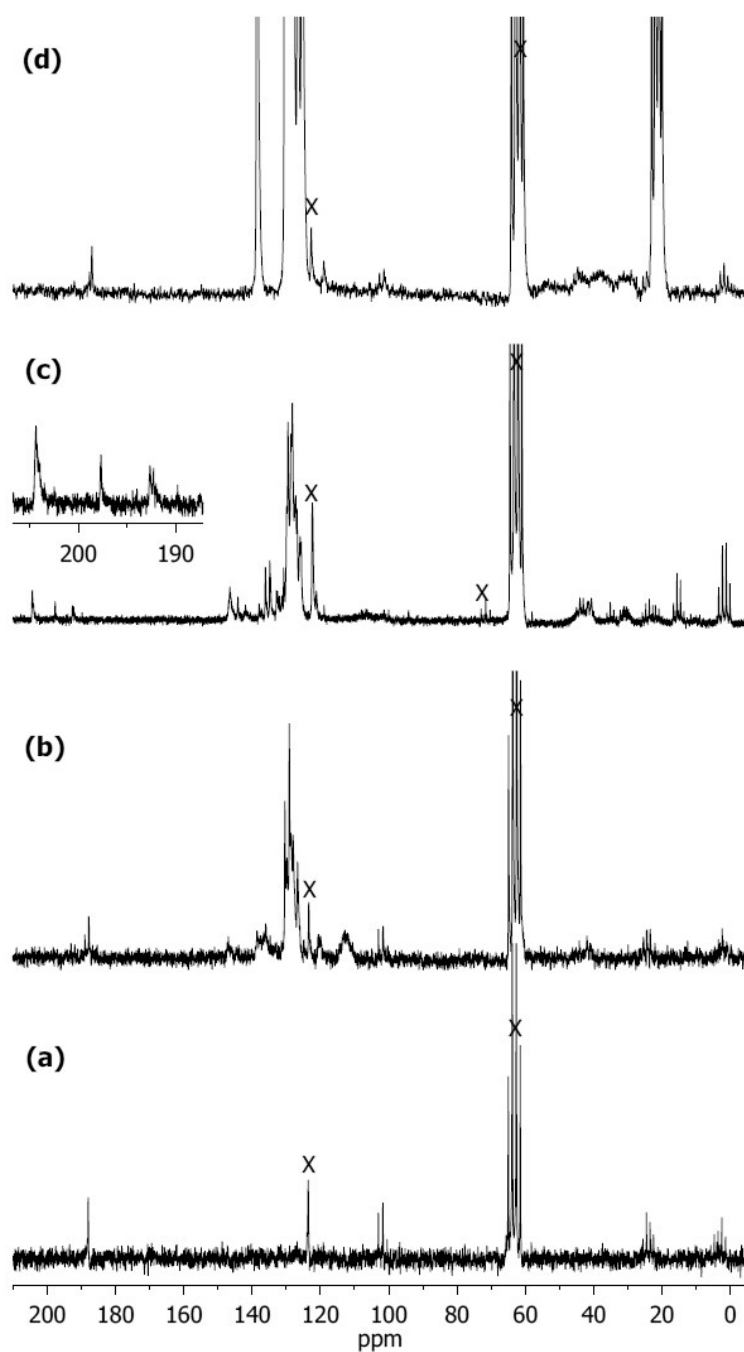

Fig. S9.  $^{13}\text{C}$  NMR spectra of the (a) complex **1**, (b) reaction mixture of **1** and St (St: Pd = 4:1) after 2 h, (c) 20 h, (d) the reaction mixture of **1** and NB (NB: Pd = 4:1, NB 80 mol% in toluene) in  $\text{CH}_3\text{NO}_2$  at 25 °C. Crosses mark signals assigned to solvents or impurities in solvent.



## References:

- 1 I. Yoshida, H. Kobayashi and K. Ueno, *J. Inorg. Nucl. Chem.*, 1973, **35**, 4061–4070.
- 2 F. Neese, *Wiley Interdiscip. Rev. Comput. Mol. Sci.*, 2012, **2**, 73–78.
- 3 A. D. Becke, *Phys. Rev. A*, 1988, **38**, 3098–3100.
- 4 J. P. Perdew, *Phys. Rev. B*, 1986, **33**, 8822–8824.
- 5 K. Eichkorn, O. Treutler, H. Öhm, M. Häser and R. Ahlrichs, *Chem. Phys. Lett.*, 1995, **242**, 652–660.
- 6 M. Bühl and H. Kabrede, *J. Chem. Theory Comput.*, 2006, **2**, 1282–1290.
- 7 M. Bühl, C. Reimann, D. A. Pantazis, T. Bredow and F. Neese, *J. Chem. Theory Comput.*, 2008, **4**, 1449–1459.
- 8 C. J. Cramer and D. G. Truhlar, *Phys. Chem. Chem. Phys.*, 2009, **11**, 10757–10816.
- 9 M. Waller, H. Braun, N. Hojdis and M. Bühl, *J. Chem. Theory Comput.*, 2007, **3**, 2234–2242.
- 10 M. J. Szabo, R. F. Jordan, A. Michalak, W. E. Piers, T. Weiss, S.-Y. Yang and T. Ziegler, *Organometallics*, 2004, **23**, 5565–5572.
- 11 S. Tobisch and T. Ziegler, *J. Am. Chem. Soc.*, 2004, **126**, 9059–9071.
- 12 F. Weigend, *Phys. Chem. Chem. Phys.*, 2006, **8**, 1057–65.
- 13 F. Weigend and R. Ahlrichs, *Phys. Chem. Chem. Phys.*, 2005, **7**, 3297–305.
- 14 E. van Lenthe, A. van der Avoird and P. E. S. Wormer, *J. Chem. Phys.*, 1998, **108**, 4783–4796.
- 15 E. van Lenthe, J. G. Snijders and E. J. Baerends, *J. Chem. Phys.*, 1996, **105**, 6505–6516.
- 16 E. van Lenthe, S. Faas and J. S. Snijders, *Chem. Phys. Lett.*, 2000, **328**, 107–112.
- 17 C. B. Hübschle, G. M. Sheldrick and B. Dittrich, *J. Appl. Crystallogr.*, 2011, **44**, 1281–1284.

Computed Cartesian coordinates (Å) and energies (hartrees) for all species computed with the BP86 functional.

**Cation of 1**

BP86 Energy = -5715.171182466

|    |           |           |           |
|----|-----------|-----------|-----------|
| Pd | -0.279111 | -0.000472 | 0.007560  |
| C  | -2.402556 | 2.352748  | 0.029509  |
| N  | -1.668225 | 1.447058  | 0.021404  |
| C  | -3.312382 | 3.484538  | 0.038980  |
| H  | -3.921177 | 3.476082  | 0.960549  |
| H  | -2.737419 | 4.426522  | 0.000130  |
| H  | -3.984500 | 3.440363  | -0.836478 |
| C  | -2.403771 | -2.352778 | 0.000071  |
| N  | -1.668196 | -1.448068 | 0.003486  |
| C  | -3.314127 | -3.484603 | -0.003050 |
| H  | -3.666352 | -3.691334 | 1.022650  |
| H  | -4.185774 | -3.271630 | -0.646388 |
| H  | -2.796467 | -4.380242 | -0.389735 |
| C  | 2.351445  | -1.253962 | -0.010949 |
| O  | 1.074429  | -1.455758 | -0.005946 |
| C  | 2.351229  | 1.253651  | 0.002753  |
| O  | 1.074167  | 1.455133  | 0.010595  |
| C  | 2.995402  | -0.000075 | -0.007623 |
| H  | 4.089755  | 0.000051  | -0.013386 |
| C  | 3.163380  | -2.528370 | -0.021498 |
| H  | 2.906695  | -3.137222 | 0.864376  |
| H  | 2.900709  | -3.126196 | -0.913153 |
| H  | 4.245309  | -2.327450 | -0.024049 |
| C  | 3.162933  | 2.528250  | 0.005998  |
| H  | 2.895983  | 3.138425  | -0.875912 |
| H  | 2.910381  | 3.124593  | 0.901574  |
| H  | 4.244868  | 2.327601  | -0.004174 |

**Path I**

**A**

BP86 Energy = -6039.398695009

|    |           |           |           |
|----|-----------|-----------|-----------|
| Pd | -0.033322 | 0.271637  | -0.411909 |
| C  | 2.098391  | 2.575299  | -0.793475 |
| N  | 1.243715  | 1.788426  | -0.699317 |
| C  | 3.176677  | 3.541105  | -0.893662 |
| H  | 2.801433  | 4.558493  | -0.685425 |
| H  | 3.953967  | 3.284608  | -0.151856 |
| H  | 3.618516  | 3.519502  | -1.905428 |
| C  | -2.593342 | 2.031499  | -1.024130 |
| N  | -1.623176 | 1.420280  | -0.813427 |
| C  | -3.804765 | 2.789075  | -1.284464 |
| H  | -4.281054 | 3.079502  | -0.331404 |
| H  | -3.567150 | 3.701793  | -1.858634 |
| H  | -4.514809 | 2.174693  | -1.866739 |
| C  | -0.957131 | -2.453220 | 0.031447  |
| O  | -1.315211 | -1.228398 | -0.162966 |
| C  | 1.533344  | -2.139563 | 0.114932  |
| O  | 1.573736  | -0.845583 | -0.008709 |
| C  | 0.369648  | -2.928920 | 0.124886  |
| H  | 0.502526  | -4.006971 | 0.255676  |
| C  | -2.118322 | -3.409780 | 0.164646  |
| H  | -2.731074 | -3.121909 | 1.038502  |
| H  | -2.767115 | -3.332313 | -0.726278 |
| H  | -1.783869 | -4.450724 | 0.286300  |
| C  | 2.890575  | -2.778476 | 0.272483  |
| H  | 3.564523  | -2.423222 | -0.526854 |
| H  | 3.324900  | -2.459608 | 1.236212  |
| H  | 2.832376  | -3.877091 | 0.247510  |
| F  | 2.667317  | -0.782929 | 2.759319  |
| F  | 3.369639  | 1.042786  | 1.569670  |
| B  | 2.410578  | 0.381092  | 2.195022  |
| F  | 1.217267  | 0.932573  | 2.337407  |

**B**

BP86 Energy = -6039.368469586

|    |           |           |           |
|----|-----------|-----------|-----------|
| H  | 5.407091  | -0.787819 | 1.088146  |
| H  | 5.577522  | -0.172500 | -0.592570 |
| C  | 5.050630  | -0.900423 | 0.049026  |
| H  | 5.286435  | -1.921228 | -0.300539 |
| H  | 0.950774  | 4.360217  | 1.549192  |
| C  | 3.617223  | -0.676252 | -0.014005 |
| C  | 0.100493  | 4.072578  | 0.905656  |
| H  | 0.036903  | 4.773216  | 0.054759  |
| H  | -0.835834 | 4.111969  | 1.491240  |
| N  | 2.465149  | -0.500321 | -0.067877 |
| C  | 0.267283  | 2.711818  | 0.432974  |
| N  | 0.377161  | 1.606642  | 0.072870  |
| Pd | 0.416974  | -0.349862 | -0.262885 |
| O  | -0.093451 | -2.359702 | -0.391938 |
| H  | -2.587650 | 1.999955  | -1.162296 |
| F  | -2.461817 | 2.556014  | 1.900973  |

|   |           |           |           |
|---|-----------|-----------|-----------|
| C | -1.618350 | -0.687006 | -0.620246 |
| H | -1.598547 | -0.652076 | -1.724736 |
| F | -3.092351 | 1.088815  | 3.557995  |
| C | -1.290057 | -2.040516 | -0.091327 |
| C | -2.573158 | 0.233051  | 0.050674  |
| B | -3.338084 | 1.621975  | 2.365920  |
| O | -2.694268 | 0.168915  | 1.287732  |
| C | -3.301855 | 1.235637  | -0.801063 |
| H | -4.100032 | 1.720991  | -0.222680 |
| H | -2.416486 | -2.362643 | 1.670930  |
| H | -1.650514 | -3.853539 | 0.984338  |
| C | -2.158354 | -2.907776 | 0.743164  |
| H | -3.720796 | 0.746469  | -1.698949 |
| F | -4.606594 | 1.739236  | 1.949648  |
| H | -3.113640 | -3.099934 | 0.220077  |

**C**

BP86 Energy = -6349.025974361

|    |           |           |           |
|----|-----------|-----------|-----------|
| H  | 2.831329  | 3.893325  | 2.544514  |
| H  | 2.952635  | -1.119011 | 3.479412  |
| H  | 3.273147  | 0.335483  | 2.452766  |
| C  | 2.557182  | 4.096383  | 1.494217  |
| H  | 4.148632  | -1.177813 | 2.137753  |
| H  | 3.471369  | 4.353401  | 0.930778  |
| C  | 3.173385  | -0.765137 | 2.460507  |
| H  | 1.866322  | 4.957674  | 1.467262  |
| C  | 1.923733  | 2.926501  | 0.909144  |
| C  | 2.081953  | -1.227290 | 1.511001  |
| O  | 1.183474  | -1.969872 | 1.880576  |
| N  | 1.417623  | 1.983580  | 0.441622  |
| H  | 3.002869  | 0.037958  | -0.019983 |
| C  | 2.225861  | -0.739567 | 0.066823  |
| H  | -3.404283 | -1.816254 | 3.454813  |
| H  | -1.244508 | -2.051296 | 2.196514  |
| H  | 4.193982  | -2.057421 | -2.157075 |
| C  | -3.356755 | -1.559327 | 2.390221  |
| C  | -2.150468 | -1.694344 | 1.691434  |
| F  | 1.277643  | -5.155697 | -1.473297 |
| C  | 2.450774  | -1.780914 | -0.971388 |
| Pd | 0.489742  | 0.367711  | -0.476628 |
| O  | 1.955385  | -2.920232 | -0.817533 |
| H  | -0.096914 | -2.234982 | 0.147470  |
| C  | 3.279832  | -1.436006 | -2.180450 |
| B  | 1.968849  | -4.192918 | -2.092021 |
| F  | 3.288125  | -4.388261 | -2.297135 |
| H  | 3.547899  | -0.370482 | -2.226251 |
| N  | -1.091877 | 1.627852  | -1.015783 |
| H  | -5.460921 | -1.028780 | 2.261057  |
| C  | -4.511306 | -1.116831 | 1.718599  |
| C  | -0.807963 | -1.579516 | -0.382072 |
| C  | -2.077349 | -1.369138 | 0.307972  |
| H  | -2.809145 | 4.295489  | -1.204765 |
| H  | 2.740708  | -1.749341 | -3.091440 |
| C  | -1.942052 | 2.377281  | -1.295596 |
| F  | 1.313561  | -3.523016 | -3.095748 |
| C  | -0.455338 | -1.173951 | -1.686608 |
| C  | -3.009364 | 3.301267  | -1.641109 |
| H  | 0.306678  | -1.756653 | -2.219394 |
| C  | -4.459498 | -0.809784 | 0.342481  |
| C  | -3.254852 | -0.929270 | -0.357718 |
| H  | -3.970911 | 2.928513  | -1.246205 |
| H  | -1.181908 | -0.660176 | -2.329977 |
| H  | -3.086460 | 3.402628  | -2.738113 |
| H  | -5.372281 | -0.502212 | -0.182245 |
| H  | -3.231539 | -0.729654 | -1.436001 |

**C-TS**

BP86 Energy = -6348.984058291

Nimag=1 (-252.20 cm\*\*<sup>-1</sup>)

|   |           |           |           |
|---|-----------|-----------|-----------|
| H | 4.374848  | 2.632565  | 2.031726  |
| H | 2.118113  | 1.892348  | -2.984057 |
| H | 0.619138  | 1.431237  | -2.116780 |
| C | 3.496091  | 2.458590  | 2.677295  |
| H | 1.281898  | 0.337353  | -3.358959 |
| H | 3.067754  | 3.433594  | 2.967304  |
| C | 1.557208  | 1.045884  | -2.557386 |
| H | 3.819279  | 1.925394  | 3.588053  |
| C | 2.513629  | 1.667270  | 1.955604  |
| C | 2.404872  | 0.389092  | -1.483666 |
| O | 3.399748  | 0.928323  | -1.027589 |
| N | 1.743310  | 1.024024  | 1.360334  |
| H | 2.189522  | -1.599985 | -2.012127 |
| C | 2.012422  | -1.061434 | -1.061986 |
| H | -5.553061 | -0.905308 | -0.693958 |
| H | -3.465097 | -1.770750 | 0.363387  |
| H | 4.885555  | -2.487292 | 0.385260  |
| C | -4.582823 | -0.722057 | -1.171579 |
| C | -3.409212 | -1.207743 | -0.577183 |
| F | 0.439964  | -1.984621 | 2.880131  |

|    |           |           |           |
|----|-----------|-----------|-----------|
| C  | 2.912492  | -1.754293 | -0.031888 |
| Pd | 0.352781  | -0.212888 | 0.346354  |
| O  | 2.451918  | -2.236153 | 0.998428  |
| H  | -1.177021 | -2.219890 | 0.337403  |
| C  | 4.380238  | -1.857193 | -0.362771 |
| B  | 0.876770  | -3.162582 | 2.443271  |
| F  | 1.796050  | -3.818861 | 3.112521  |
| H  | 4.811554  | -0.838772 | -0.369353 |
| N  | -1.156026 | 0.580918  | 1.472658  |
| H  | -5.434905 | 0.356723  | -2.857099 |
| C  | -4.517985 | -0.018595 | -2.387702 |
| C  | -0.947298 | -1.577469 | -0.527332 |
| C  | -2.145102 | -1.007867 | -1.188271 |
| H  | -3.229080 | 1.061746  | 3.829421  |
| H  | 4.537336  | -2.271066 | -1.376392 |
| C  | -2.023850 | 1.042501  | 2.101888  |
| F  | 0.206955  | -3.761677 | 1.459431  |
| C  | 0.254530  | -1.971250 | -1.250217 |
| C  | -3.109617 | 1.614409  | 2.881213  |
| H  | 0.673528  | -2.930006 | -0.922546 |
| C  | -3.271338 | 0.190122  | -3.006829 |
| C  | -2.099334 | -0.300804 | -2.415567 |
| H  | -4.053402 | 1.556256  | 2.310581  |
| H  | 0.197643  | -1.860782 | -2.341169 |
| H  | -2.897592 | 2.673254  | 3.111047  |
| H  | -3.215675 | 0.729384  | -3.959637 |
| H  | -1.139730 | -0.131751 | -2.918869 |

**D**

BP86 Energy = -6349.047358068

|    |           |           |           |
|----|-----------|-----------|-----------|
| H  | -1.606648 | 5.680586  | 1.689685  |
| H  | -0.071255 | 6.089362  | 0.854223  |
| H  | -1.610699 | 6.052197  | -0.067876 |
| C  | -1.040765 | 5.572467  | 0.747429  |
| C  | -0.827617 | 4.164268  | 0.451312  |
| N  | -0.658280 | 3.033028  | 0.216934  |
| H  | 3.797007  | 2.326664  | 0.985705  |
| O  | 1.600727  | 1.267005  | 0.535058  |
| H  | -5.291116 | 1.065231  | -1.268387 |
| C  | 3.957069  | 1.286909  | 0.666028  |
| Pd | -0.323670 | 0.927876  | -0.131542 |
| H  | 4.409952  | 0.695678  | 1.484655  |
| N  | -2.155877 | 0.702869  | -0.885505 |
| H  | 4.682878  | 1.237039  | -0.166605 |
| C  | -3.242579 | 0.570288  | -1.291116 |
| C  | 2.657832  | 0.654776  | 0.281322  |
| C  | -4.595801 | 0.381649  | -1.785711 |
| H  | -4.639964 | 0.581488  | -2.871110 |
| F  | 6.904152  | -1.431652 | -0.090169 |
| H  | -0.635319 | -1.296977 | 2.290057  |
| H  | -4.915490 | -0.658938 | -1.598578 |
| F  | 6.702977  | -1.663053 | 2.180269  |
| H  | -2.445573 | -2.650013 | 3.323392  |
| C  | -1.292508 | -1.899054 | 1.647842  |
| C  | 2.594202  | -0.697243 | -0.420261 |
| H  | 1.431746  | -1.548898 | 1.206438  |
| C  | 0.000970  | -1.101582 | -0.399274 |
| B  | 6.571191  | -2.172506 | 0.967842  |
| H  | 2.436864  | -0.474896 | -1.498713 |
| C  | -2.317653 | -2.657238 | 2.233528  |
| C  | 1.384721  | -1.523291 | 0.101485  |
| C  | -1.106450 | -1.887310 | 0.243001  |
| O  | 4.438421  | -1.580340 | 0.816276  |
| H  | -0.044617 | -1.203504 | -1.502671 |
| C  | 3.855775  | -1.563328 | -0.265659 |
| F  | 6.401891  | -3.478927 | 0.803140  |
| C  | -3.176795 | -3.427902 | 1.429169  |
| C  | -1.981213 | -2.667317 | -0.552177 |
| H  | 1.529321  | -2.576619 | -0.218890 |
| H  | -3.972554 | -4.026627 | 1.889068  |
| C  | -3.003164 | -3.432959 | 0.033504  |
| H  | -1.841249 | -2.689252 | -1.642367 |
| H  | 4.984910  | -1.766506 | -2.057834 |
| C  | 4.298370  | -2.385771 | -1.447117 |
| H  | -3.656159 | -4.047395 | -0.599376 |
| H  | 3.454946  | -2.685616 | -2.091859 |
| H  | 4.863493  | -3.264367 | -1.100168 |

**Path II**

**E**

BP86 Energy = -5892.04873785

|    |           |           |          |
|----|-----------|-----------|----------|
| Pd | 7.084035  | 1.227997  | 5.767812 |
| C  | 9.026625  | -1.274743 | 5.756408 |
| N  | 8.321393  | -0.347420 | 5.688149 |
| C  | 9.904456  | -2.428094 | 5.850980 |
| H  | 10.269348 | -2.713958 | 4.849161 |
| H  | 10.770680 | -2.190511 | 6.493552 |
| H  | 9.358827  | -3.282686 | 6.289326 |
| C  | 5.434001  | 3.349226  | 6.925532 |

|   |          |           |           |
|---|----------|-----------|-----------|
| O | 5.789614 | 2.740571  | 5.837780  |
| C | 6.821445 | 2.072019  | 8.590895  |
| O | 7.398652 | 1.248795  | 7.784827  |
| C | 5.889980 | 3.071947  | 8.228325  |
| H | 5.486548 | 3.690925  | 9.034331  |
| C | 4.429068 | 4.454139  | 6.692899  |
| H | 4.165773 | 4.974884  | 7.625009  |
| H | 4.841163 | 5.180477  | 5.969920  |
| H | 3.512398 | 4.030770  | 6.244450  |
| C | 7.215380 | 1.898639  | 10.040266 |
| H | 6.953391 | 0.877241  | 10.370668 |
| H | 8.311107 | 1.999417  | 10.139088 |
| H | 6.720766 | 2.628980  | 10.697385 |
| C | 8.905510 | 5.142193  | 2.785134  |
| C | 7.733548 | 5.886336  | 2.554362  |
| C | 8.813749 | 3.784860  | 3.114320  |
| H | 7.802707 | 6.946343  | 2.282241  |
| H | 9.728151 | 3.201014  | 3.283815  |
| C | 6.471431 | 5.267399  | 2.655270  |
| C | 7.548756 | 3.147109  | 3.228594  |
| H | 5.561605 | 5.845180  | 2.454240  |
| C | 6.375266 | 3.912830  | 2.991834  |
| H | 5.389915 | 3.439219  | 3.051540  |
| H | 9.888106 | 5.620562  | 2.697338  |
| C | 7.515798 | 1.716530  | 3.529428  |
| H | 8.484472 | 1.207747  | 3.410667  |
| C | 6.387914 | 0.901036  | 3.742995  |
| H | 5.374889 | 1.317528  | 3.692557  |
| H | 6.465294 | -0.182051 | 3.587753  |

**E-TS**

BP86 Energy = -5891.986364276  
Nimag=1 (-56.79 cm\*\*<sup>-1</sup>)

|    |           |           |           |
|----|-----------|-----------|-----------|
| Pd | 6.937543  | 2.779552  | 5.555511  |
| C  | 9.279734  | 0.271388  | 5.696959  |
| N  | 8.412943  | 1.055600  | 5.652010  |
| C  | 10.358153 | -0.704220 | 5.753557  |
| H  | 9.958809  | -1.697709 | 6.022852  |
| H  | 10.861187 | -0.776898 | 4.773379  |
| H  | 11.101160 | -0.404204 | 6.513431  |
| C  | 3.854811  | 1.891357  | 7.271672  |
| O  | 4.181319  | 2.908072  | 6.443427  |
| C  | 5.939678  | 2.321647  | 8.636423  |
| O  | 6.667601  | 2.818868  | 7.742902  |
| C  | 4.637201  | 1.707877  | 8.389089  |
| H  | 4.247381  | 1.046902  | 9.171962  |
| C  | 2.610479  | 1.097246  | 6.992776  |
| H  | 1.750950  | 1.760452  | 6.783730  |
| H  | 2.741121  | 0.429423  | 6.119469  |
| H  | 2.360504  | 0.458308  | 7.853907  |
| C  | 6.447941  | 2.310249  | 10.061999 |
| H  | 7.469339  | 2.716886  | 10.106962 |
| H  | 5.783170  | 2.917268  | 10.704947 |
| H  | 6.436929  | 1.283976  | 10.473098 |
| C  | 7.924686  | 3.630714  | 1.915918  |
| C  | 8.189460  | 4.898136  | 2.504319  |
| C  | 6.949147  | 2.799610  | 2.450617  |
| H  | 8.973533  | 5.535934  | 2.077978  |
| H  | 6.756652  | 1.807257  | 2.024572  |
| C  | 7.446330  | 5.354674  | 3.596329  |
| C  | 6.167889  | 3.239307  | 3.573889  |
| H  | 7.634310  | 6.349747  | 4.015427  |
| C  | 6.397706  | 4.560358  | 4.129199  |
| H  | 5.675144  | 5.022090  | 4.814188  |
| H  | 8.505060  | 3.305440  | 1.044655  |
| C  | 5.300355  | 2.367704  | 4.355742  |
| H  | 5.309476  | 1.301067  | 4.078626  |
| C  | 4.011278  | 2.852339  | 5.013307  |
| H  | 3.763328  | 3.881238  | 4.705636  |
| H  | 3.165266  | 2.200245  | 4.728754  |

**F**

BP86 Energy = -5891.996822741

|    |           |           |          |
|----|-----------|-----------|----------|
| Pd | 7.149407  | 2.362569  | 5.260056 |
| C  | 8.422992  | -0.531114 | 5.744041 |
| N  | 7.881433  | 0.490290  | 5.566771 |
| C  | 9.111534  | -1.792354 | 5.967049 |
| H  | 9.381333  | -2.257659 | 5.002675 |
| H  | 10.035454 | -1.619286 | 6.547076 |
| H  | 8.465061  | -2.488532 | 6.530817 |
| C  | 4.340957  | 1.883293  | 7.161781 |
| O  | 4.584313  | 2.485630  | 5.970353 |
| C  | 6.402186  | 2.935030  | 8.323026 |
| O  | 7.207644  | 3.144673  | 7.386181 |
| C  | 5.131967  | 2.195483  | 8.243346 |
| H  | 4.747273  | 1.853864  | 9.211958 |
| C  | 3.141873  | 0.981940  | 7.256431 |
| H  | 2.240586  | 1.482985  | 6.857389 |
| H  | 3.286147  | 0.052579  | 6.673173 |

|                                |           |           |           |   |           |           |           |
|--------------------------------|-----------|-----------|-----------|---|-----------|-----------|-----------|
| H                              | 2.952216  | 0.686615  | 8.298923  | C | -3.277017 | -0.719461 | -0.998656 |
| C                              | 6.773602  | 3.439173  | 9.703563  | H | -3.210829 | -0.699960 | -2.098079 |
| H                              | 7.761192  | 3.923726  | 9.676162  | C | -4.460733 | -1.065177 | -0.444637 |
| H                              | 6.016319  | 4.160188  | 10.065162 | H | -4.617768 | -1.111702 | 0.640759  |
| H                              | 6.790831  | 2.605130  | 10.429772 | H | -5.323238 | -1.317960 | -1.071469 |
| C                              | 7.769844  | 4.592431  | 2.047941  |   |           |           |           |
| C                              | 7.857908  | 5.590863  | 3.064381  |   |           |           |           |
| C                              | 7.000987  | 3.456215  | 2.237212  |   |           |           |           |
| H                              | 8.480287  | 6.477942  | 2.895508  |   |           |           |           |
| H                              | 6.953722  | 2.675029  | 1.467963  |   |           |           |           |
| C                              | 7.136146  | 5.463897  | 4.244764  |   |           |           |           |
| C                              | 6.239569  | 3.290888  | 3.447271  |   |           |           |           |
| H                              | 7.168411  | 6.255168  | 5.003434  |   |           |           |           |
| C                              | 6.296698  | 4.328804  | 4.462524  |   |           |           |           |
| H                              | 5.537285  | 4.375427  | 5.251319  |   |           |           |           |
| H                              | 8.325763  | 4.724674  | 1.111981  |   |           |           |           |
| C                              | 5.661675  | 2.017081  | 3.830639  |   |           |           |           |
| H                              | 5.803487  | 1.198216  | 3.107587  |   |           |           |           |
| C                              | 4.407435  | 1.830522  | 4.689430  |   |           |           |           |
| H                              | 3.525176  | 2.274501  | 4.185548  |   |           |           |           |
| H                              | 4.218858  | 0.752021  | 4.826012  |   |           |           |           |
| <b>G</b>                       |           |           |           |   |           |           |           |
| BP86 Energy = -6024.796806168  |           |           |           |   |           |           |           |
| Pd                             | 3.767052  | 2.791900  | 6.114944  |   |           |           |           |
| C                              | 3.148833  | 4.801737  | 3.696526  |   |           |           |           |
| N                              | 3.389202  | 4.071644  | 4.576666  |   |           |           |           |
| C                              | 2.838196  | 5.707622  | 2.601813  |   |           |           |           |
| H                              | 2.499406  | 5.137146  | 1.718999  |   |           |           |           |
| H                              | 2.036478  | 6.405604  | 2.901566  |   |           |           |           |
| H                              | 3.732494  | 6.293419  | 2.324622  |   |           |           |           |
| C                              | 8.157943  | 2.497970  | 5.639864  |   |           |           |           |
| O                              | 6.836594  | 2.194969  | 5.716533  |   |           |           |           |
| C                              | 8.130967  | 3.479017  | 7.990965  |   |           |           |           |
| O                              | 6.959352  | 3.218035  | 8.295953  |   |           |           |           |
| C                              | 8.761674  | 3.103189  | 6.713659  |   |           |           |           |
| H                              | 9.824578  | 3.342424  | 6.594314  |   |           |           |           |
| C                              | 8.907051  | 2.161949  | 4.378490  |   |           |           |           |
| H                              | 9.953086  | 2.492637  | 4.458976  |   |           |           |           |
| H                              | 8.909604  | 1.072780  | 4.185164  |   |           |           |           |
| H                              | 8.462903  | 2.652701  | 3.492506  |   |           |           |           |
| C                              | 9.028755  | 4.235591  | 8.964034  |   |           |           |           |
| H                              | 8.463070  | 4.476968  | 9.876799  |   |           |           |           |
| H                              | 9.911124  | 3.624945  | 9.232079  |   |           |           |           |
| H                              | 9.410980  | 5.167374  | 8.507641  |   |           |           |           |
| C                              | 2.674578  | -0.783527 | 7.451984  |   |           |           |           |
| C                              | 3.122242  | -0.238916 | 8.688733  |   |           |           |           |
| C                              | 3.208568  | -0.343151 | 6.249686  |   |           |           |           |
| H                              | 2.692089  | -0.607910 | 9.627517  |   |           |           |           |
| H                              | 2.853366  | -0.754728 | 5.296982  |   |           |           |           |
| C                              | 4.107064  | 0.742159  | 8.707507  |   |           |           |           |
| C                              | 4.266532  | 0.630031  | 6.237695  |   |           |           |           |
| H                              | 4.474631  | 1.149535  | 9.656586  |   |           |           |           |
| C                              | 4.706011  | 1.197253  | 7.496011  |   |           |           |           |
| H                              | 5.615198  | 1.822304  | 7.559824  |   |           |           |           |
| H                              | 1.897282  | -1.557846 | 7.451112  |   |           |           |           |
| C                              | 4.701072  | 1.285951  | 5.009332  |   |           |           |           |
| H                              | 4.134186  | 0.981742  | 4.113118  |   |           |           |           |
| C                              | 6.136400  | 1.595646  | 4.628754  |   |           |           |           |
| H                              | 6.625986  | 0.644882  | 4.323928  |   |           |           |           |
| H                              | 6.136041  | 2.265167  | 3.745472  |   |           |           |           |
| H                              | 1.106330  | 5.023820  | 10.004864 |   |           |           |           |
| C                              | 2.050849  | 5.439828  | 9.613122  |   |           |           |           |
| H                              | 2.802286  | 5.442768  | 10.422882 |   |           |           |           |
| C                              | 2.526649  | 4.637196  | 8.497728  |   |           |           |           |
| H                              | 1.873558  | 6.479766  | 9.288352  |   |           |           |           |
| N                              | 2.914638  | 3.989809  | 7.606897  |   |           |           |           |
| <b>MeCN</b>                    |           |           |           |   |           |           |           |
| BP86 Energy = -132.759232161   |           |           |           |   |           |           |           |
| C                              | -1.699669 | -0.000012 | 0.844914  |   |           |           |           |
| H                              | -2.733702 | -0.009016 | 1.230914  |   |           |           |           |
| H                              | -1.174546 | -0.891294 | 1.231151  |   |           |           |           |
| H                              | -1.190190 | 0.900317  | 1.231134  |   |           |           |           |
| C                              | -1.699586 | -0.000002 | -0.615904 |   |           |           |           |
| N                              | -1.699585 | 0.000007  | -1.786629 |   |           |           |           |
| <b>MeCN*BF3</b>                |           |           |           |   |           |           |           |
| BP86 Energy = -456.988510799   |           |           |           |   |           |           |           |
| F                              | 5.756501  | 7.374376  | 4.006476  |   |           |           |           |
| N                              | 4.834358  | 6.453829  | 1.688191  |   |           |           |           |
| C                              | 4.825425  | 6.436736  | 0.521838  |   |           |           |           |
| B                              | 4.811720  | 6.450714  | 3.841912  |   |           |           |           |
| C                              | 4.811266  | 6.416537  | -0.934858 |   |           |           |           |
| F                              | 5.136344  | 5.167621  | 3.992089  |   |           |           |           |
| F                              | 3.535610  | 6.808725  | 3.975163  |   |           |           |           |
| H                              | 4.329063  | 7.330374  | -1.323668 |   |           |           |           |
| H                              | 4.249925  | 5.537879  | -1.297696 |   |           |           |           |
| H                              | 5.841761  | 6.365381  | -1.326257 |   |           |           |           |
| <b>1</b>                       |           |           |           |   |           |           |           |
| BP86 Energy = -6139.366778033  |           |           |           |   |           |           |           |
| Pd                             | -0.151849 | -0.004167 | 0.399651  |   |           |           |           |
| C                              | -2.492939 | 2.071537  | 0.703775  |   |           |           |           |
| N                              | -1.542270 | 1.401240  | 0.605680  |   |           |           |           |
| C                              | -3.650032 | 2.924449  | 0.840772  |   |           |           |           |
| H                              | -4.513947 | 2.299218  | 1.184123  |   |           |           |           |
| H                              | -3.444237 | 3.738684  | 1.557066  |   |           |           |           |
| H                              | -3.907864 | 3.355275  | -0.142440 |   |           |           |           |
| C                              | -2.571828 | -1.975694 | 0.763975  |   |           |           |           |
| N                              | -1.591272 | -1.354219 | 0.640563  |   |           |           |           |
| C                              | -3.768870 | -2.765518 | 0.931912  |   |           |           |           |
| H                              | -4.606872 | -2.082388 | 1.227119  |   |           |           |           |
| H                              | -4.033606 | -3.243921 | -0.027469 |   |           |           |           |
| H                              | -3.610363 | -3.543261 | 1.699256  |   |           |           |           |
| C                              | 2.421289  | -1.305975 | -0.042250 |   |           |           |           |
| O                              | 1.167858  | -1.488607 | 0.190333  |   |           |           |           |
| C                              | 2.459186  | 1.205385  | -0.080323 |   |           |           |           |
| O                              | 1.212735  | 1.432120  | 0.150419  |   |           |           |           |
| C                              | 3.074227  | -0.061578 | -0.179570 |   |           |           |           |
| H                              | 4.149114  | -0.080913 | -0.383693 |   |           |           |           |
| C                              | 3.209651  | -2.591927 | -0.173903 |   |           |           |           |
| H                              | 3.065531  | -3.206363 | 0.732887  |   |           |           |           |
| H                              | 2.816434  | -3.176774 | -1.025531 |   |           |           |           |
| H                              | 4.284308  | -2.408054 | -0.326020 |   |           |           |           |
| C                              | 3.283754  | 2.462898  | -0.255898 |   |           |           |           |
| H                              | 2.906337  | 3.028594  | -1.127410 |   |           |           |           |
| H                              | 3.158062  | 3.112613  | 0.628790  |   |           |           |           |
| H                              | 4.352491  | 2.243688  | -0.402125 |   |           |           |           |
| F                              | -4.358395 | 0.095504  | 0.419714  |   |           |           |           |
| B                              | -5.733050 | 0.131435  | 0.803400  |   |           |           |           |
| F                              | -5.930597 | 1.290916  | 1.598430  |   |           |           |           |
| F                              | -6.533774 | 0.149756  | -0.315698 |   |           |           |           |
| F                              | -5.991674 | -1.013881 | 1.600492  |   |           |           |           |
| <b>Pd(acac) (F*BF3) (MeCN)</b> |           |           |           |   |           |           |           |
| BP86 Energy = -6006.585379831  |           |           |           |   |           |           |           |
| H                              | 3.960950  | 1.207036  | 3.397390  |   |           |           |           |
| H                              | 2.714587  | 2.344075  | 4.031843  |   |           |           |           |
| H                              | 3.369324  | 4.589893  | 4.153949  |   |           |           |           |
| C                              | 3.334368  | 2.084474  | 3.159904  |   |           |           |           |
| H                              | 5.577944  | 7.236164  | 4.279305  |   |           |           |           |
| H                              | 3.846501  | 6.833353  | 4.553062  |   |           |           |           |
| C                              | 4.103487  | 4.496071  | 3.347868  |   |           |           |           |
| C                              | 4.218257  | 3.232732  | 2.722112  |   |           |           |           |
| C                              | 4.634081  | 6.933963  | 3.790585  |   |           |           |           |
| H                              | 2.678123  | 1.792680  | 2.319976  |   |           |           |           |
| C                              | 4.854005  | 5.645933  | 3.023999  |   |           |           |           |
| O                              | 5.025583  | 2.932803  | 1.769199  |   |           |           |           |
| O                              | 5.756507  | 5.742285  | 2.109222  |   |           |           |           |
| H                              | 4.362315  | 7.740073  | 3.086253  |   |           |           |           |
| Pd                             | 6.273734  | 4.225479  | 0.930755  |   |           |           |           |
| F                              | 6.109665  | 1.568487  | -2.141494 |   |           |           |           |
| F                              | 6.888183  | 2.691800  | -0.272664 |   |           |           |           |
| F                              | 5.344258  | 3.696908  | -1.691971 |   |           |           |           |
| B                              | 6.417287  | 2.832481  | -1.754041 |   |           |           |           |
| N                              | 7.568198  | 5.348611  | -0.081621 |   |           |           |           |
| H                              | 10.154161 | 6.050688  | -1.821303 |   |           |           |           |
| C                              | 8.259325  | 5.672956  | -0.963248 |   |           |           |           |
| <b>BF3</b>                     |           |           |           |   |           |           |           |
| BP86 Energy = -324.218579688   |           |           |           |   |           |           |           |
| F                              | 4.018860  | 6.360486  | 1.011983  |   |           |           |           |
| F                              | 5.896529  | 6.987151  | 2.147684  |   |           |           |           |
| B                              | 5.031041  | 6.056836  | 1.798967  |   |           |           |           |
| F                              | 5.177170  | 4.823028  | 2.237865  |   |           |           |           |
| <b>Styrene</b>                 |           |           |           |   |           |           |           |
| BP86 Energy = -309.639317220   |           |           |           |   |           |           |           |
| C                              | -0.884513 | -0.027009 | -1.074814 |   |           |           |           |
| C                              | -2.027857 | -0.354397 | -0.305107 |   |           |           |           |
| C                              | 0.329175  | 0.328431  | -0.465185 |   |           |           |           |
| H                              | 1.199252  | 0.577812  | -1.085636 |   |           |           |           |
| C                              | -1.908068 | -0.312184 | 1.107154  |   |           |           |           |
| C                              | 0.427907  | 0.365069  | 0.935701  |   |           |           |           |
| H                              | -2.773287 | -0.560450 | 1.734114  |   |           |           |           |
| H                              | 1.373770  | 0.643419  | 1.417092  |   |           |           |           |
| C                              | -0.698015 | 0.042300  | 1.717921  |   |           |           |           |
| H                              | -0.629671 | 0.068254  | 2.813317  |   |           |           |           |
| H                              | -0.955759 | -0.054650 | -2.171029 |   |           |           |           |

|   |          |          |           |
|---|----------|----------|-----------|
| F | 7.500346 | 3.382522 | -2.424531 |
| C | 9.088235 | 6.009267 | -2.104742 |
| H | 8.785536 | 6.978339 | -2.537166 |
| H | 8.927039 | 5.203520 | -2.844829 |

**Pd(acac)(F)(MeCN)**

BP86 Energy = -5682.318618961

|    |           |          |           |
|----|-----------|----------|-----------|
| H  | 2.796934  | 2.510170 | 3.776165  |
| H  | 3.959205  | 1.373482 | 3.002232  |
| C  | 3.359211  | 2.288990 | 2.855468  |
| H  | 3.604083  | 4.672847 | 4.060479  |
| H  | 2.647793  | 2.078148 | 2.036553  |
| H  | 4.218531  | 6.833957 | 4.649825  |
| C  | 4.271499  | 4.628373 | 3.193828  |
| C  | 4.272229  | 3.428422 | 2.444559  |
| H  | 5.921293  | 7.242637 | 4.241939  |
| C  | 4.929949  | 6.991462 | 3.824140  |
| C  | 5.053254  | 5.775966 | 2.923758  |
| O  | 4.982297  | 3.175310 | 1.405868  |
| H  | 4.603273  | 7.861320 | 3.225872  |
| O  | 5.891629  | 5.917260 | 1.962336  |
| Pd | 6.282870  | 4.465012 | 0.597836  |
| F  | 6.670734  | 3.106082 | -0.694111 |
| N  | 7.584442  | 5.639428 | -0.295157 |
| C  | 8.369954  | 6.281500 | -0.872376 |
| H  | 10.373546 | 6.810449 | -1.265664 |
| C  | 9.353248  | 7.066206 | -1.602831 |
| H  | 9.185292  | 8.145802 | -1.438445 |
| H  | 9.276935  | 6.855978 | -2.685073 |

**[Pd(acac)(MeCN)]+**

BP86 Energy = -5582.343669773

|    |           |          |           |
|----|-----------|----------|-----------|
| Pd | 6.271851  | 3.969774 | 1.223553  |
| C  | 8.394695  | 2.454860 | -0.569623 |
| N  | 7.616088  | 3.008407 | 0.101091  |
| C  | 9.362141  | 1.764351 | -1.401463 |
| H  | 8.969319  | 0.775798 | -1.698212 |
| H  | 9.564954  | 2.357436 | -2.310938 |
| H  | 10.307209 | 1.624245 | -0.847134 |
| C  | 4.275027  | 5.791853 | 2.253598  |
| O  | 5.012618  | 4.756684 | 2.478367  |
| C  | 5.036087  | 6.224877 | -0.096148 |
| O  | 5.895111  | 5.266256 | -0.236171 |
| C  | 4.259818  | 6.517742 | 1.041033  |
| H  | 3.587223  | 7.377570 | 0.981421  |
| C  | 3.391216  | 6.191559 | 3.409038  |
| H  | 2.685550  | 5.370515 | 3.631449  |
| H  | 4.008969  | 6.343863 | 4.311709  |
| H  | 2.826032  | 7.108801 | 3.189081  |
| C  | 4.913931  | 7.072533 | -1.346801 |
| H  | 5.910256  | 7.442991 | -1.643286 |
| H  | 4.533460  | 6.448340 | -2.175183 |
| H  | 4.234680  | 7.922833 | -1.188079 |
